# Supplementary material for: Clever use of natural clay materials in the synthesis of non-symmetric carbonates by utilizing CO2as a feedstock: Ag/attapulgite nano-catalyst
Source: Royal Society of Chemistry journal article supplement (doi:10.1039/d0dt01992e), 2020-01-01
Supplement: d0dt01992e1.pdf [file d0dt01992e1.pdf]

*Supporting Information*

**Clever Use of Natural Clay Materials in Synthesis  
of Non-symmetric Carbonates by Utilizing CO<sub>2</sub> as  
a Feedstock: Ag/Attapulгите Nano-Catalyst**

*Ruixiang Guo<sup>a</sup>, Gang Wang<sup>a,b</sup> and Weisheng Liu<sup>a\*</sup>*

*<sup>a</sup> Key Laboratory of Nonferrous Metal Chemistry and Resources Utilization of Gansu Province and State Key Laboratory of Applied Organic Chemistry, Key Laboratory of Special Function Materials and Structure Design, Ministry of Education, College of Chemistry and Chemical Engineering, Lanzhou University, Lanzhou, 730000, China.*

*<sup>b</sup> Lanzhou Petrochemical College of Vocational Technology, Lanzhou, 730060, China*

\*Corresponding author.

E-mail: liuws@lzu.edu.cn.

**Contents**

- 1. Catalyst characterization**
- 2. Catalysis details**
- 3. <sup>1</sup>H NMR spectra**
- 4. Reaction cycles**

## 1. Catalyst characterization

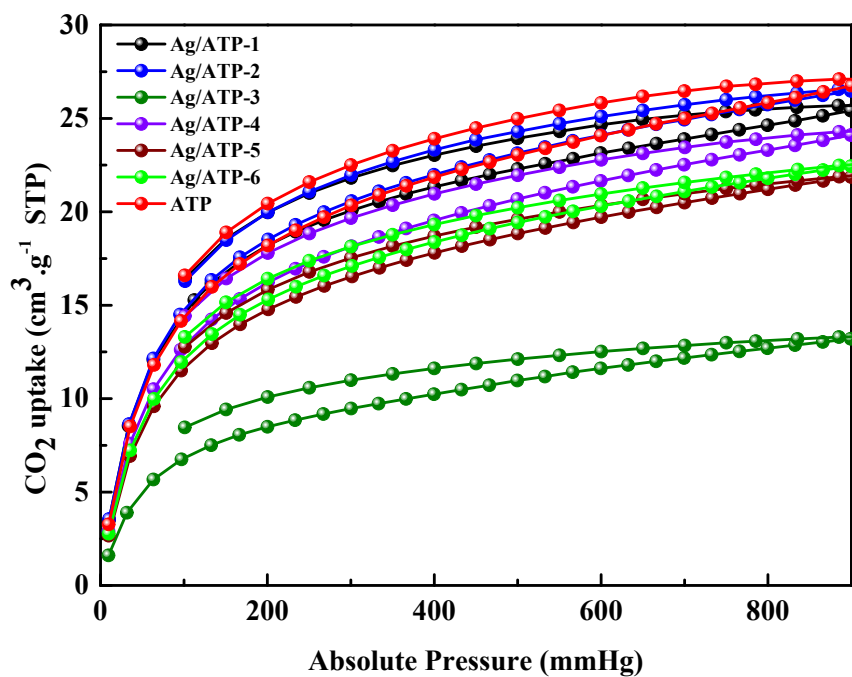

Figure S1. CO<sub>2</sub> adsorption-desorption isotherm curves of Ag/ATP (298K)

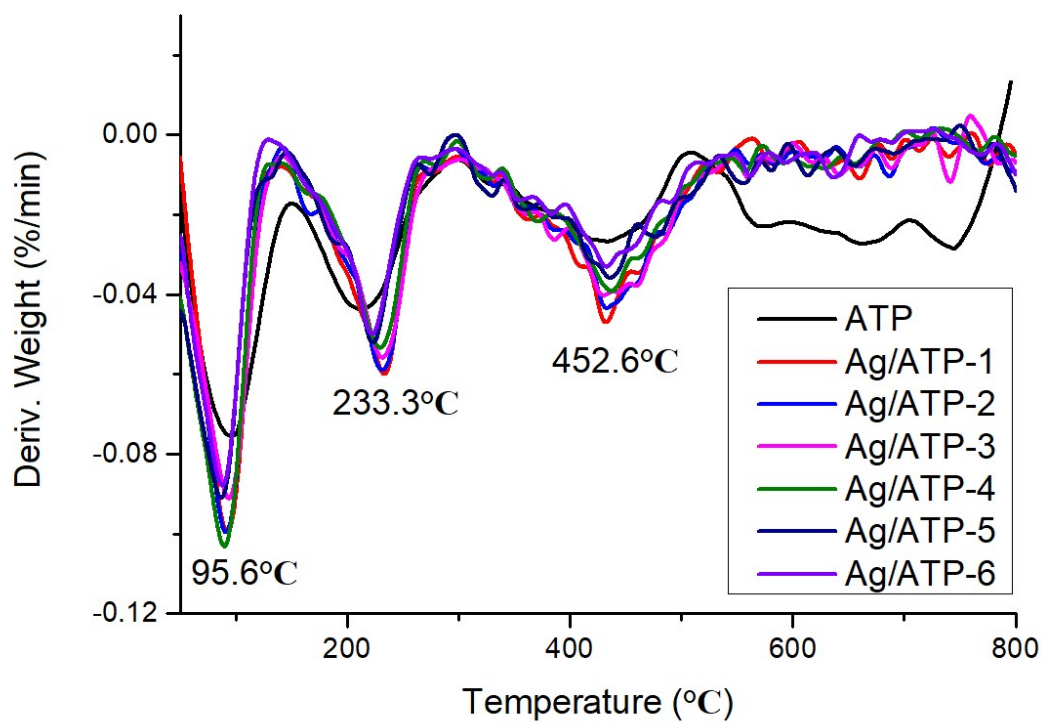

Figure S2. Derivative Thermogravimetry (DTG) curves of ATP and Ag/ATP catalysts

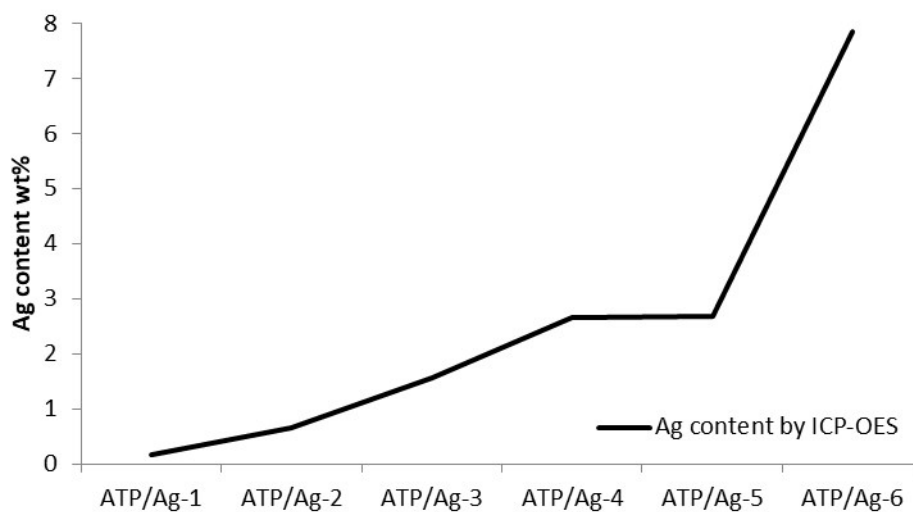

Figure S3. Ag content of Ag/ATP catalysts

## 2. Catalysis details

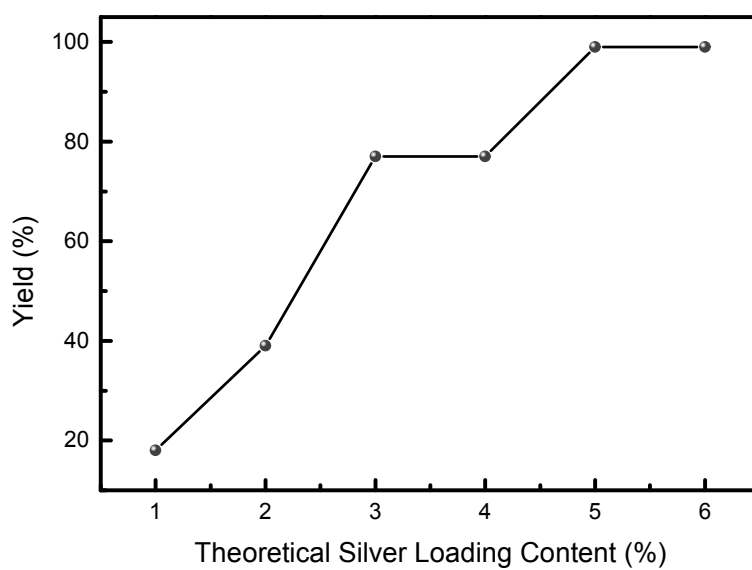

Figure S4. Effect of theoretical silver loading content on the yield. Reaction conditions: 3 mmol 1a, 2 mmol 2a, 10mg Ag/ATP, 0.3 mmol DBN, 1 mL DMF, 6 h, 60 °C, 1 MPa CO<sub>2</sub>.

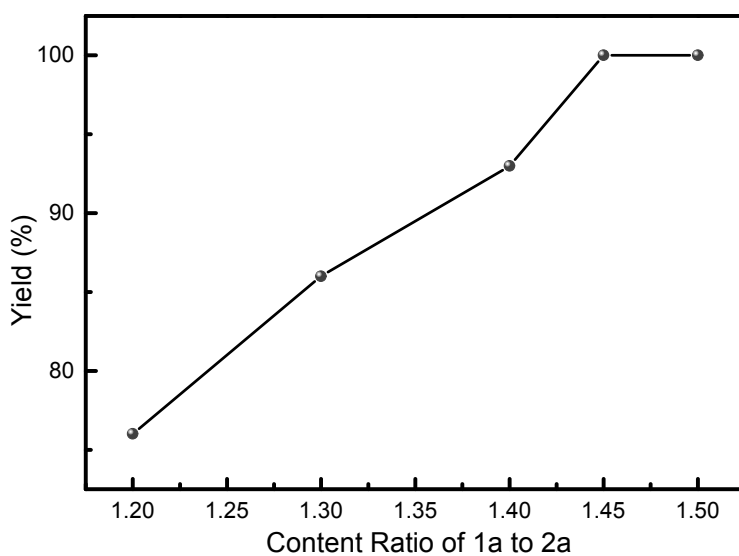

Figure S5. Effect of content ratio of 1a to 2a on the yield. Reaction conditions: 10mg Ag/ATP-5, 0.3 mmol DBN, 1 mL DMF, 6 h, 60 °C, 1 MPa CO<sub>2</sub>.

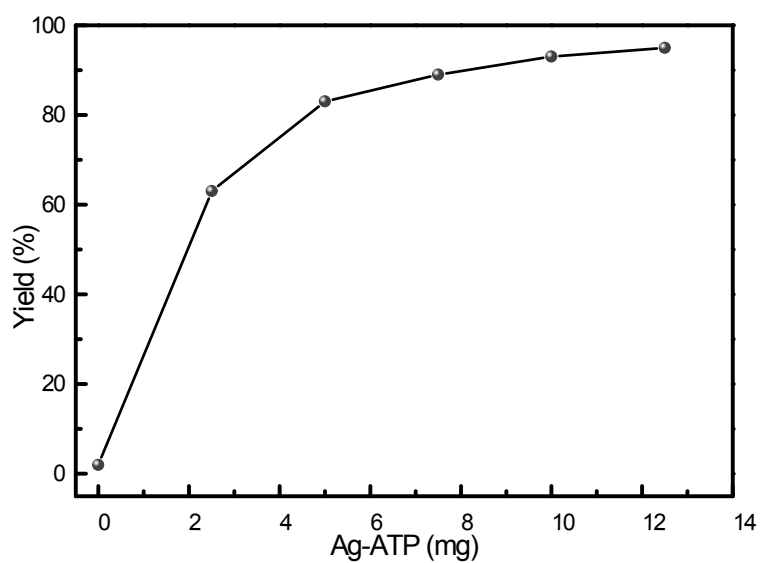

Figure S6. Effect of catalyst content on the yield. Reaction conditions: 2.8 mmol 1a, 2 mmol 2a, 0.3 mmol DBN, 1 mL DMF, 6 h, 60 °C, 1 MPa CO<sub>2</sub>.

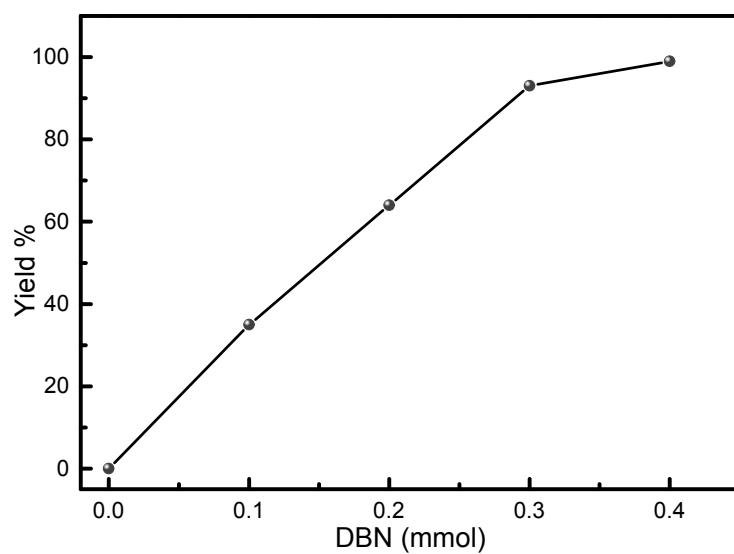

Figure S7. Effect of cocatalyst content on the yield. Reaction conditions: 2.8 mmol 1a, 2 mmol 2a, 10mg Ag/ATP-5, 1 mL DMF, 6 h, 60 °C, 1 MPa CO<sub>2</sub>.

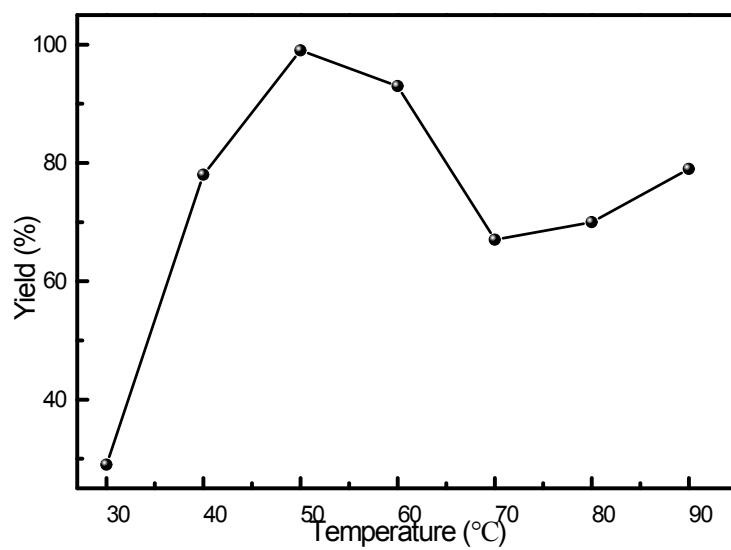

Figure S8. Effect of temperature on the yield. Reaction conditions: 2.8 mmol 1a, 2 mmol 2a, 10mg Ag/ATP-5, 0.3 mmol DBN, 1 mL DMF, 6 h, 1 MPa CO<sub>2</sub>.

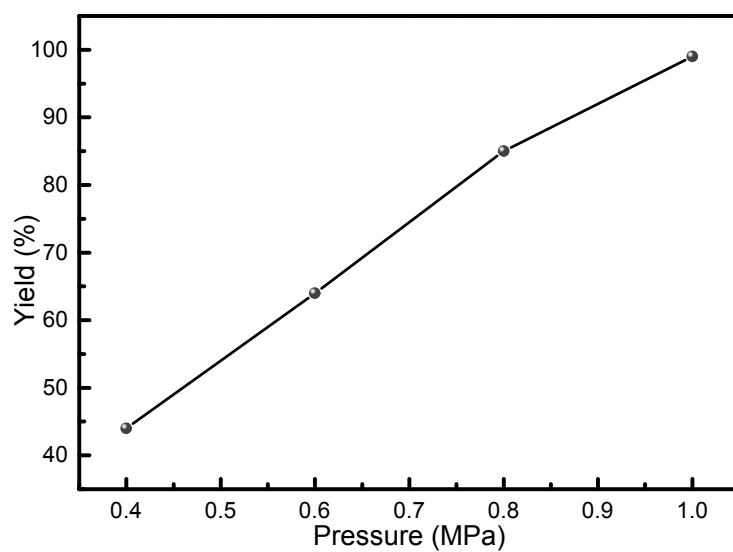

Figure S9. Effect of pressure on the yield. Reaction conditions: 10mg Ag/ATP-5, 0.3 mmol DBN, 1 mL DMF, 6 h, 50 °C.

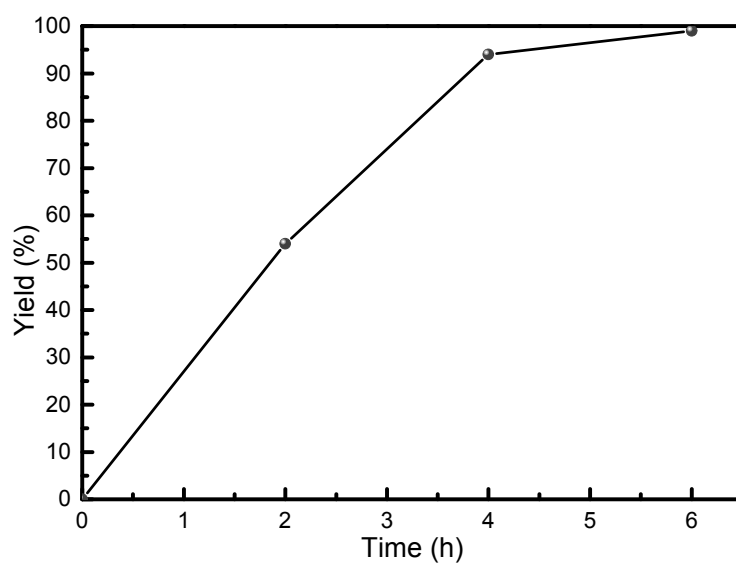

Figure S10. Effect of time on the yield. Reaction conditions: 3 mmol 1a, 2 mmol 2a, 10mg Ag/ATP, 0.3 mmol DBN, 1 mL DMF, 50 °C, 1 MPa CO<sub>2</sub>.

Table S1 Effect of the cocatalyst time on the yield <sup>a</sup>.

| Entry | Catalyst | Co-catalyst                     | Solvent | T (°C) | Yield (%) |
|-------|----------|---------------------------------|---------|--------|-----------|
| 1     | Ag/ATP-5 | DBN                             | DMF     | 60     | 99        |
| 2     | Ag/ATP-5 | K <sub>2</sub> CO <sub>3</sub>  | DMF     | 60     | -         |
| 3     | Ag/ATP-5 | Cs <sub>2</sub> CO <sub>3</sub> | DMF     | 60     | -         |

|   |          |                  |     |    |    |
|---|----------|------------------|-----|----|----|
| 4 | Ag/ATP-5 | TBAB             | DMF | 60 | -  |
| 5 | Ag/ATP-5 | PPNCl            | DMF | 60 | -  |
| 6 | Ag/ATP-5 | PPh <sub>3</sub> | DMF | 60 | 1  |
| 7 | Ag/ATP-5 | TMEDA            | DMF | 60 | 33 |
| 8 | Ag/ATP-5 | DMAP             | DMF | 60 | 19 |
| 9 | Ag/ATP-5 | DBU              | DMF | 60 | 71 |

<sup>a</sup> Reaction conditions: 3 mmol 1a, 2 mmol 2a, 10mg catalyst, 0.3 mmol cocatalyst, 1 mL solvent, 6 h, 1 MPa CO<sub>2</sub>.

Table S2 Effect of the cocatalyst time on the yield <sup>a</sup>.

| Entry | Catalyst | Cocatalyst | Solvent      | T (°C) | Yield (%) |
|-------|----------|------------|--------------|--------|-----------|
| 1     | Ag/ATP-5 | DBN        | DMF          | 50     | 99        |
| 2     | Ag/ATP-5 | DBN        | Dioxane      | 50     | 27        |
| 3     | Ag/ATP-5 | DBN        | THF          | 50     | 27        |
| 4     | Ag/ATP-5 | DBN        | tert-Butanol | 50     | 22        |
| 5     | Ag/ATP-5 | DBN        | ACN          | 50     | 47        |

<sup>a</sup> Reaction conditions: 2.8 mmol 1a, 2 mmol 2a, 10mg catalyst, 0.3 mmol cocatalyst, 1 mL solvent, 6 h, 1 MPa CO<sub>2</sub>.

Table S3 Performance of selected catalytic systems in the reaction of CO<sub>2</sub> with 1a and 2a.

| Entry          | 1a (mmol) | 2a (mmol) | Catalyst (mmol)                         | CO <sub>2</sub> (MPa) | t (h) | T (°C) | Yield (%) | Tof (h <sup>-1</sup> ) |
|----------------|-----------|-----------|-----------------------------------------|-----------------------|-------|--------|-----------|------------------------|
| 1 <sup>1</sup> | 1.5       | 1         | ZnCl <sub>2</sub><br>0.5                | 1                     | 24    | 80     | 94        | 0.083                  |
| 2 <sup>2</sup> | 1.5       | 1         | Silver sulfadiazine<br>0.05             | 0.1                   | 24    | 80     | 98        | 0.817                  |
| 3 <sup>3</sup> | 1.5       | 1         | Ag <sub>2</sub> CO <sub>3</sub><br>0.05 | 1                     | 12    | 80     | 98        | 1.633                  |
| 4 <sup>a</sup> | 2.8       | 2         | Ag/ATP-5<br>10mg <sup>b</sup>           | 1                     | 6     | 50     | 99        | 132.1                  |

<sup>a</sup> The current work; <sup>b</sup>. 2.68 wt% of the silver content, by ICP test (Figure S3).

### 3. $^1\text{H}$ NMR spectra

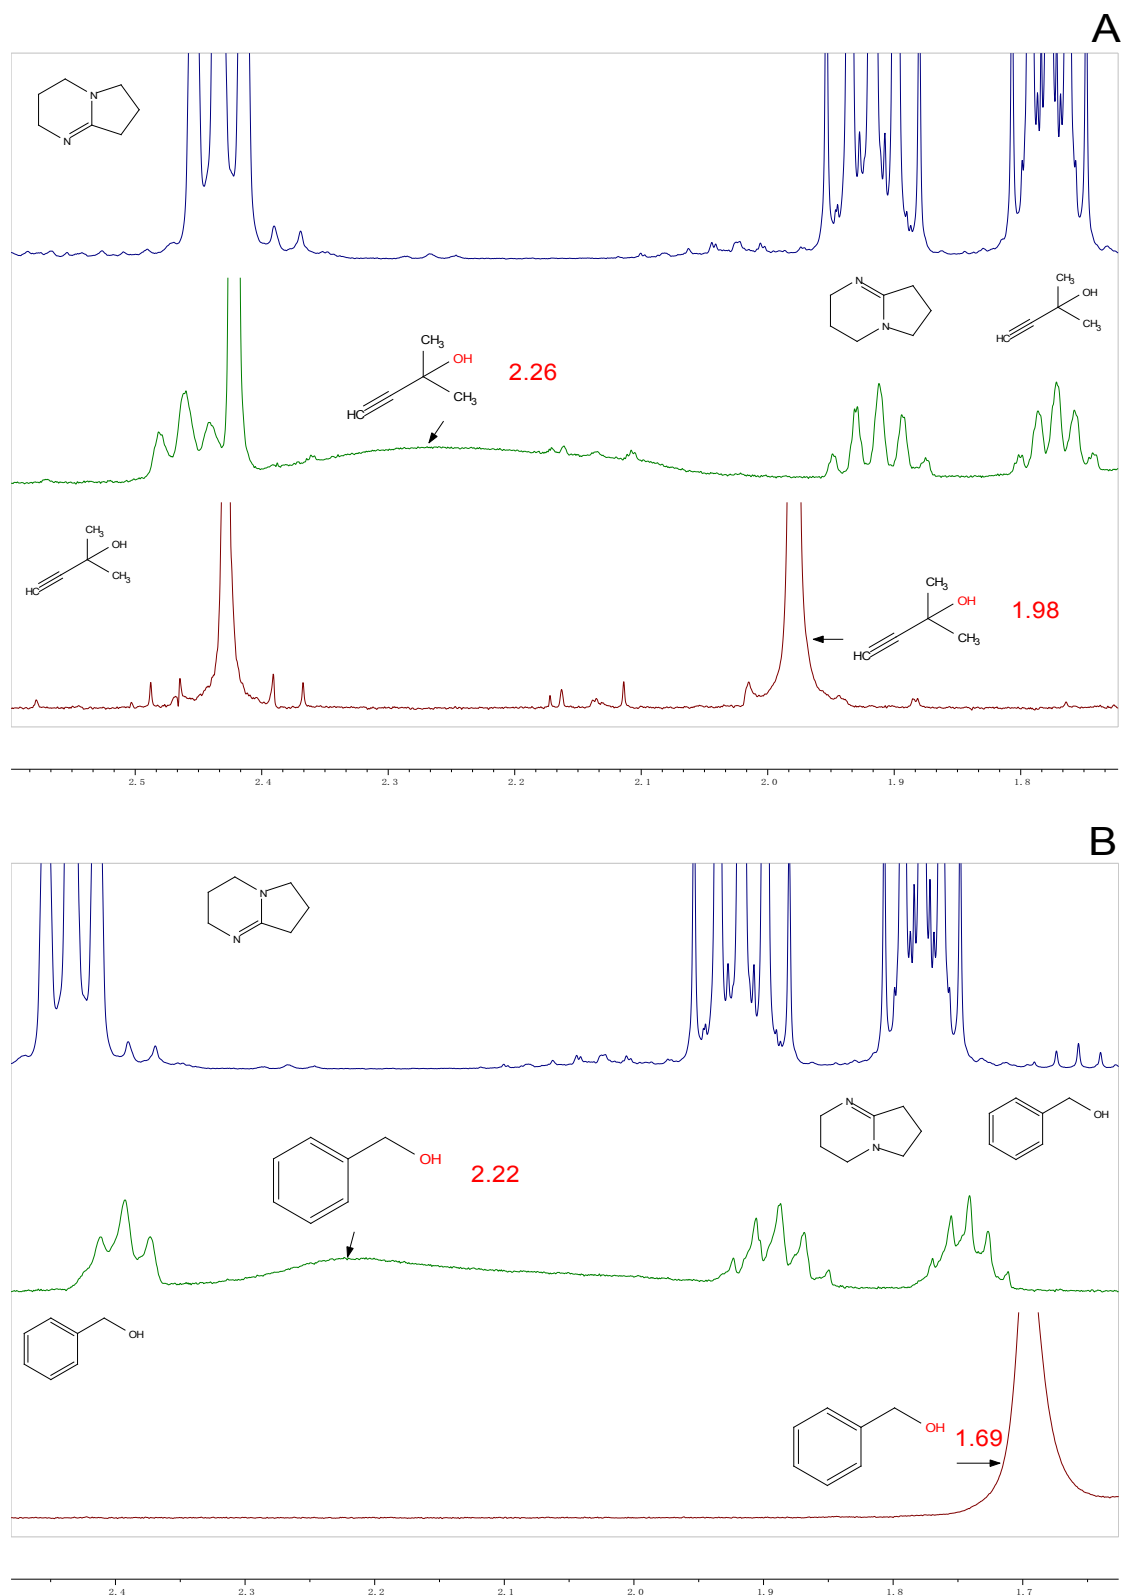

Figure S11. Figure A:  $^1\text{H}$  NMR spectra of DBN (blue), 1a/DBN (green) and 1a (red). ( $[\text{D}_6]$  DMSO, 298 K). Figure B:  $^1\text{H}$  NMR spectra of DBN (blue), 2a/DBN (green) and 2a (red). ( $[\text{D}_6]$  DMSO, 298 K). Experiment conditions: Figure A (green) 2.8 mmol (0.2352 g) 1a and 0.3 mmol (0.0373 g) DBN



were added into a 10 mL test tubes. the mixture was determined by  $^1\text{H}$  NMR; Figure B (green) 2.0 mmol (0.2163 g) 1a and 0.3 mmol (0.0373 g) DBN were added into a 10 mL test tubes. the mixture was determined by  $^1\text{H}$  NMR.

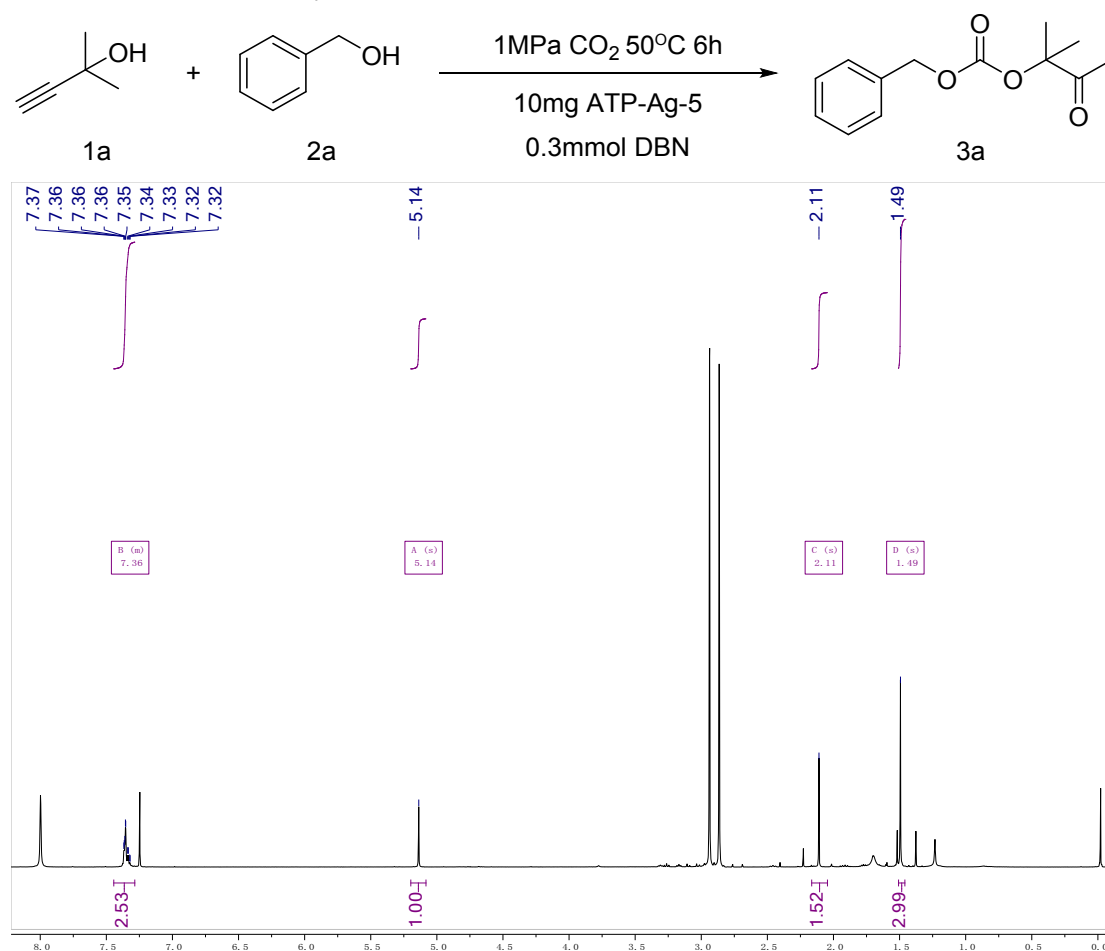

Figure S12.  $^1\text{H}$  NMR spectra of the main reaction

Main product-3a:

$^1\text{H}$  NMR (400 MHz, Chloroform-*d*)  $\delta$  7.44 – 7.28 (m, 5H), 5.14 (s, 2H), 2.11 (s, 3H), 1.49 (s, 6H).

#### 4. Reaction cycles

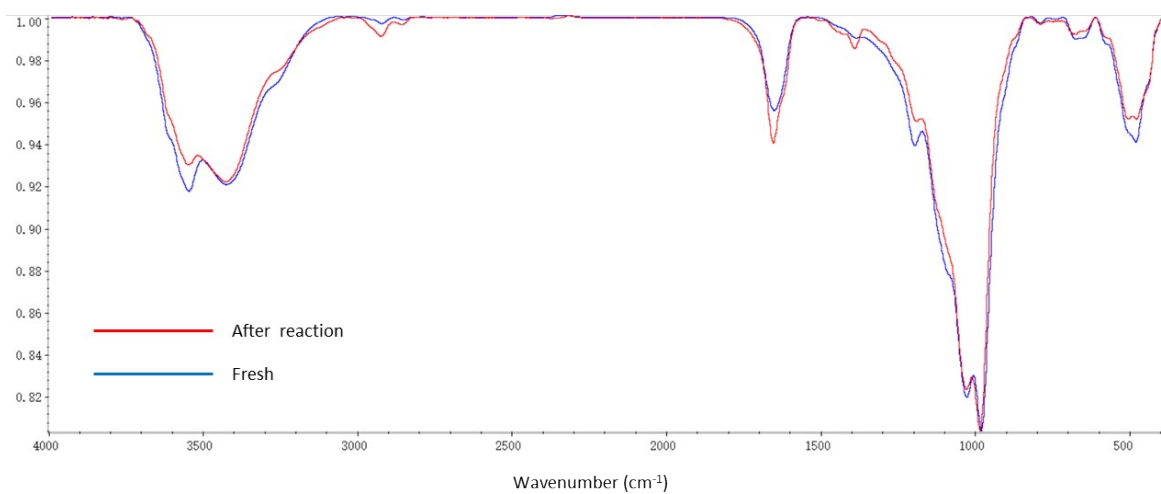

Figure S13. IR spectra of Ag/ATP and its sample after recycled reaction

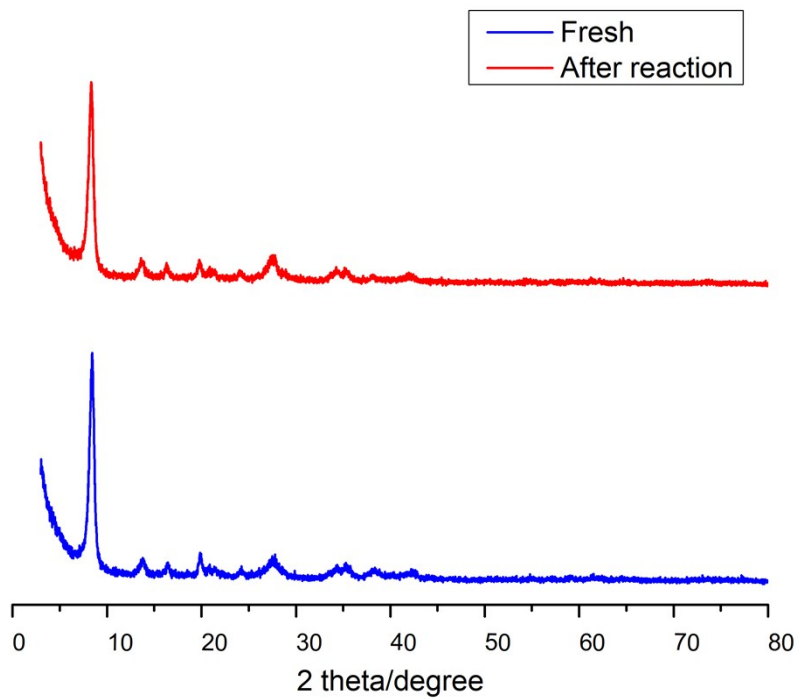

Figure S14. XRD spectra of Ag/ATP and the recycled catalyst after reaction

---

## References

1. P. Liu, Q.-W. Song, Q.-N. Zhao, J.-Y. Li and K. Zhang, *Synthesis*, 2018, **51**, 739-746.
2. J. Li, Q. Song, H. Zhang, P. Liu, K. Zhang, J. Wang and D. Zhang, *Tetrahedron*, 2019, **75**, 2343-2349.
3. Z. H. Zhou, Q. W. Song, J. N. Xie, R. Ma and L. N. He, *Chemistry, an Asian journal*, 2016, **11**, 2065-2071.
